# Supplementary material for: Dysbiosis in pre-cancerous mucosa may drive immune dysfunction – a study of immune system: microbiota interaction in familial adenomatous polyposis
Source: bioRxiv or medRxiv preprint supplement (doi:10.1101/2021.05.05.21256687), 2021-05-13
Supplement: Supplementary file [file media-1.pdf]

Supplementary Table 1. Antibodies used:

| <b>ANTIGEN</b>              | <b>FLUOROCHROME</b> | <b>mAb CLONE</b> | <b>SUPPLIER</b> |
|-----------------------------|---------------------|------------------|-----------------|
| CD4                         | BB515               | SK3              | BD Biosciences  |
| CD8 $\alpha$                | BV605               | SK1              | BioLegend       |
| CD19                        | PE-Cy5              | HIB19            | BD Biosciences  |
| CD24                        | APC-Cy7             | ML5              | BioLegend       |
| CD27                        | PE                  | M-T271           | BD Biosciences  |
| CD38                        | BV605               | HIT2             | BioLegend       |
| CD39                        | PE-Cy7              | A1               | BioLegend       |
| CD69                        | BV605               | FN50             | BioLegend       |
| CD73                        | APC                 | AD2              | BioLegend       |
| CD103 (integrin $\alpha$ E) | PE                  | Ber-ACT8         | BioLegend       |
| IgA                         | APC                 | IS11-8E10        | Miltenyi Biotec |
| IgD                         | PE-Cy7              | IA6-2            | BD Biosciences  |
| IgG                         | FITC                | IS11-3B2.2.3     | Miltenyi Biotec |
| TCR $\gamma\delta$          | FITC                | 11F2             | BD Biosciences  |
